# Supplementary material for: Receptor Activity-Modifying Protein 2 (RAMP2) alters glucagon receptor trafficking in hepatocytes with functional effects on receptor signalling
Source: PubMed Central journal article supplement (PMC8363841; doi:10.1016/j.molmet.2021.101296), 2021-07-13

# Supplementary Figure 2

## A

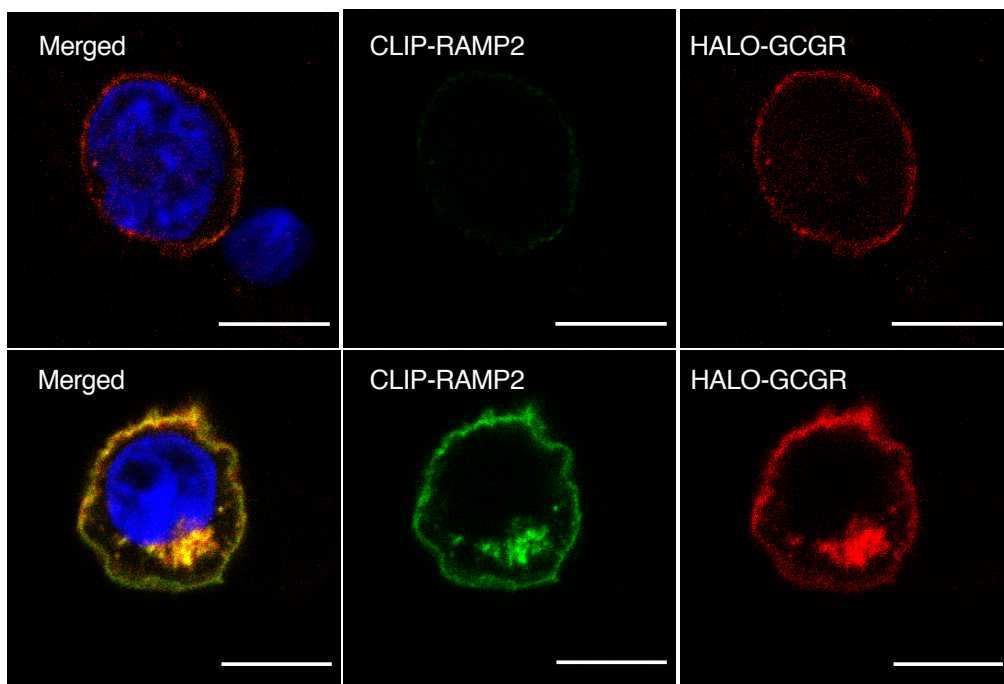

## B

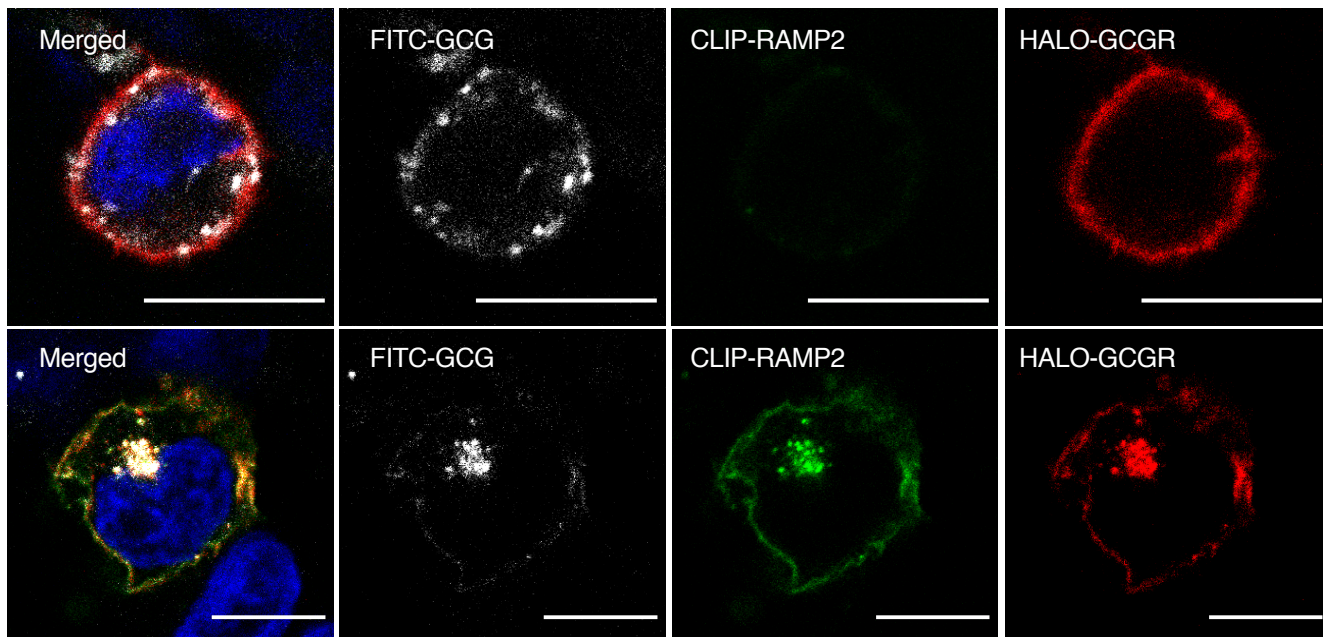

Supplement: mmc3.pdf [file mmc3.pdf]
