# Supplementary material for: Receptor Activity-Modifying Protein 2 (RAMP2) alters glucagon receptor trafficking in hepatocytes with functional effects on receptor signalling
Source: PubMed Central journal article supplement (PMC8363841; doi:10.1016/j.molmet.2021.101296), 2021-07-13

# Supplementary Figure 4

**A**

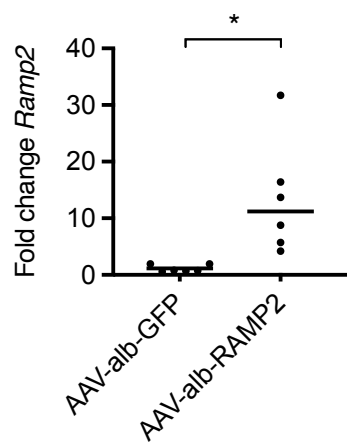

**B**

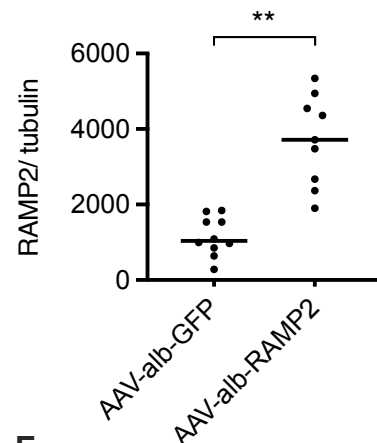

**C**

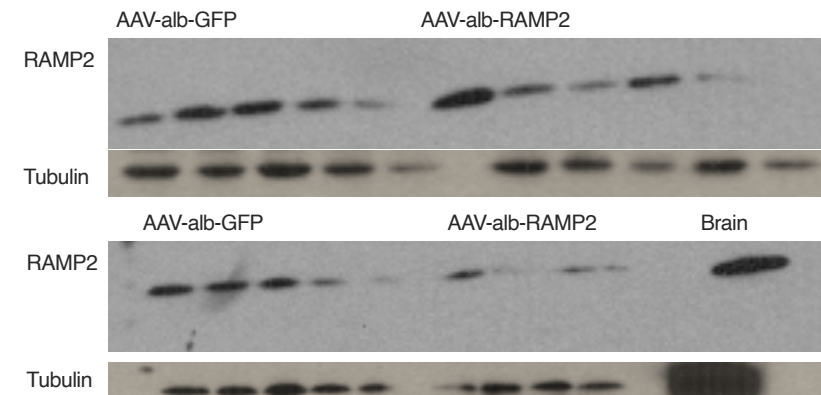

**D**

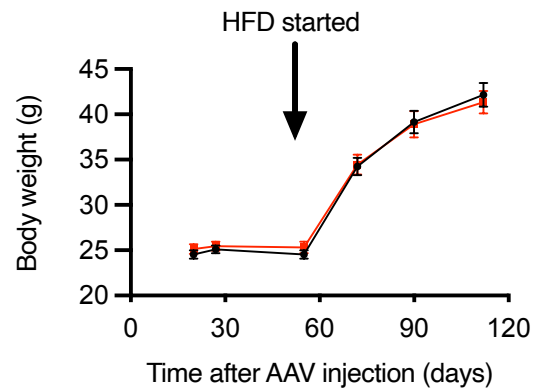

**E**

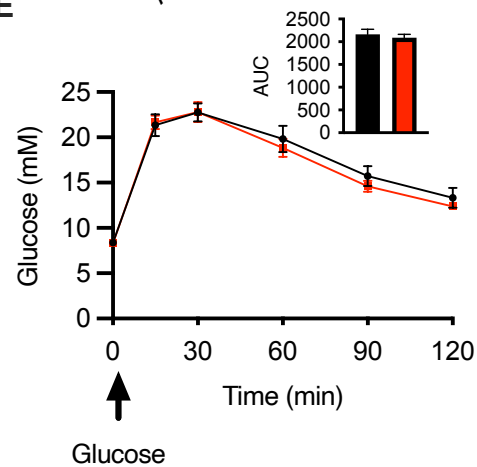

**F**

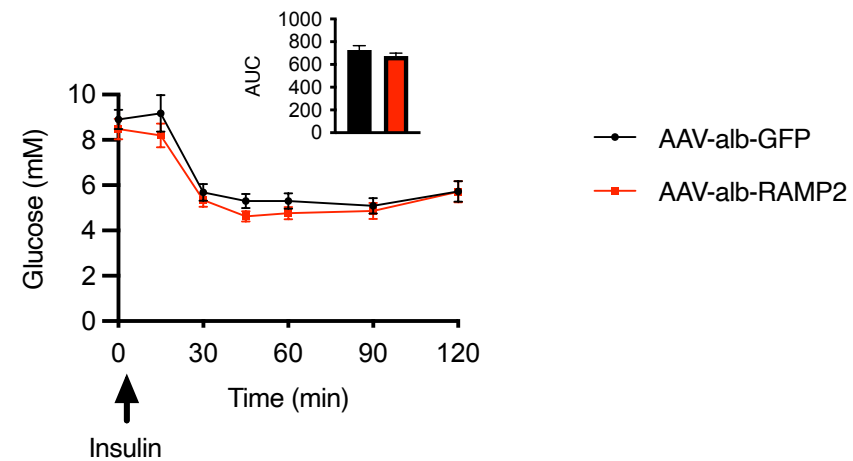

**G**

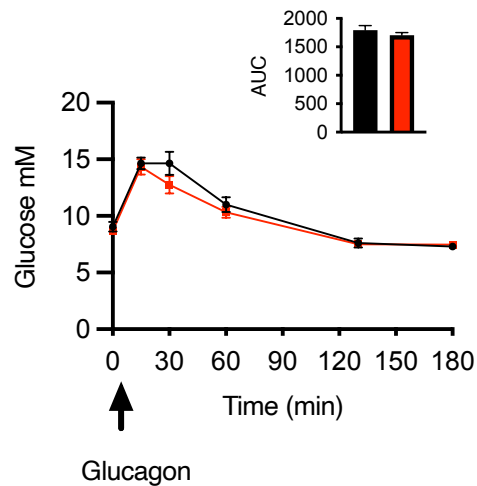

**H**

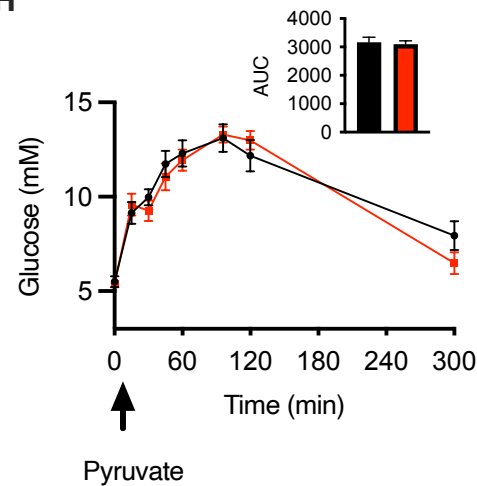

**I**

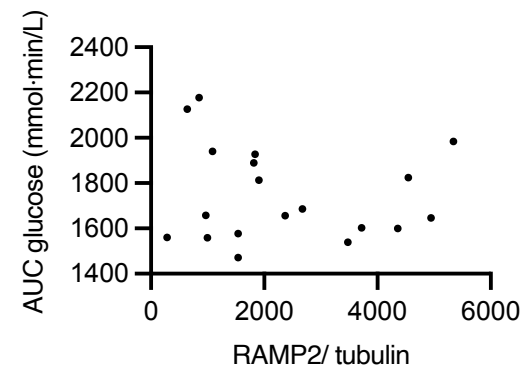

Supplement: mmc4.pdf [file mmc4.pdf]
